# Supplementary material for: The Seasonal Impact of Thinning Intensities on Soil Carbon Cycling in the Lesser Xing’an Range, Northeast China
Source: MDPI journal article supplement (doi:10.3390/f15030449), 2024-02-27
Supplement: s1 [file s1]

# Supplementary Materials

**Table S1.** Soil carbon storage in each layer degraded forests under different thinning intensities.

| Thinning intensity (%) | Carbon storage of soil (t/hm <sup>2</sup> ). |          |          |          |
|------------------------|----------------------------------------------|----------|----------|----------|
|                        | Spring                                       | Summer   | Autumn   | Winter   |
| CK (0%)                | 117.156367                                   | 120.9061 | 118.1935 | 115.3424 |
| A (10%)                | 132.645417                                   | 135.9579 | 133.2258 | 130.4726 |
| B (15%)                | 153.353086                                   | 154.4499 | 151.109  | 148.3999 |
| C (20%)                | 164.972287                                   | 167.5815 | 163.428  | 162.5007 |
| D (25%)                | 164.3297                                     | 168.9777 | 164.2003 | 162.6372 |
| E (30%)                | 181.893245                                   | 184.1488 | 183.1207 | 179.9912 |
| F (35%)                | 135.414682                                   | 137.675  | 134.2445 | 131.2552 |
